# Supplementary material for: Comparative metagenomic study unveils new insights on bacterial communities in two pine-feeding Ips beetles (Coleoptera: Curculionidae: Scolytinae)
Source: Frontiers journal article supplement (doi:10.3389/fmicb.2024.1400894), 2024-10-09
Supplement: Table_3.XLSX [file Table_3.XLSX]

## Sheet: ISX_Common ASV
ID	Taxonomy	ISX.Larvae1	ISX.Larvae2	ISX.Larvae3	ISX.Larvae4	ISX.Larvae5	ISX.Pupae1	ISX.Pupae2	ISX.Pupae3	ISX.Pupae4	ISX.Pupae5	ISX.Adult1	ISX.Adult2	ISX.Adult3	ISX.Adult4	ISX.Adult5
ASV1	k__Bacteria;p__Proteobacteria;c__Gammaproteobacteria;o__Xanthomonadales;f__Xanthomonadaceae;g__Pseudoxanthomonas	0.0167405	0.009355	0.000984737	0.00443131	0.000984737	0.000492368	0.014771	0.111275	0.00246184	0.00295421	0.000492368	0.00295421	0.00837026	0.00492368	0.00246184
ASV2	k__Bacteria;p__Proteobacteria;c__Gammaproteobacteria;o__Enterobacterales;f__Erwiniaceae	0.138848	0.0758247	0.639586	0.831118	0.0915805	0.0167405	0.0157558	0.024126	0.00196947	0.00886263	0.0167405	0.01871	0.00689316	0.00344658	0.00984737
ASV10	k__Bacteria;p__Proteobacteria;c__Gammaproteobacteria;o__Enterobacterales;f__Erwiniaceae	0	0.0201871	0.0014771	0.00344658	0	0	0.193008	0.256032	0.183653	0.137863	0.0167405	0.00640079	0.00689316	0.00393895	0.0472674
ASV8	k__Bacteria;p__Proteobacteria;c__Gammaproteobacteria;o__Enterobacterales	0.0142787	0.00541605	0.0576071	0.00295421	0.00640079	0.000492368	0.00344658	0.0221566	0.00196947	0.000984737	0.00689316	0.00640079	0.00344658	0.000492368	0.000984737
ASV9	k__Bacteria;p__Proteobacteria;c__Gammaproteobacteria;o__Pseudomonadales;f__Pseudomonadaceae;g__Pseudomonas	0	0.0226489	0.0014771	0.00443131	0	0	0.329887	0.156573	0.410635	0.335795	0.00541605	0.0103397	0.0132939	0.0201871	0.16002
ASV14	k__Bacteria;p__Proteobacteria;c__Gammaproteobacteria;o__Enterobacterales	0.014771	0.0108321	0.0536681	0.131462	0.0123092	0.0014771	0.00689316	0.000984737	0	0.000492368	0.00246184	0.00295421	0.000984737	0	0.000984737
ASV19	k__Bacteria;p__Proteobacteria;c__Gammaproteobacteria;o__Enterobacterales	0	0.00689316	0.00196947	0.00196947	0	0	0.0979813	0.13934	0.0965042	0.0689316	0.00738552	0.00393895	0.00196947	0.00196947	0.0251108
ASV37	k__Bacteria;p__Proteobacteria;c__Gammaproteobacteria;o__Pseudomonadales;f__Moraxellaceae;g__Acinetobacter	0	0.00590842	0.000984737	0.000492368	0	0	0.00590842	0.0172329	0.0891187	0.115707	0.0014771	0	0.000492368	0	0.00295421
ASV45	k__Bacteria;p__Proteobacteria;c__Alphaproteobacteria;o__Sphingomonadales;f__Sphingomonadaceae;g__Sphingomonas	0.0812408	0.046775	0.0128016	0.000984737	0.0177253	0.0260955	0.0103397	0.00689316	0.009355	0.00443131	0.000492368	0.000492368	0.000984737	0	0.000984737

## Sheet: ISX_Larvae_Pupae_Common
ID	Taxonomy	ISX.Larvae1	ISX.Larvae2	ISX.Larvae3	ISX.Larvae4	ISX.Larvae5	ISX.Pupae1	ISX.Pupae2	ISX.Pupae3	ISX.Pupae4	ISX.Pupae5
ASV111	k__Bacteria;p__Proteobacteria;c__Gammaproteobacteria;o__Burkholderiales;f__Alcaligenaceae;g__Parapusillimonas	0.000984737	0.00295421	0.00590842	0	0.0177253	0.00640079	0.00443131	0.0014771	0	0
ASV124	k__Bacteria;p__Proteobacteria;c__Gammaproteobacteria;o__Burkholderiales;f__Comamonadaceae;g__Diaphorobacter	0	0.00295421	0.00393895	0	0.0260955	0.00640079	0.00344658	0	0	0.000492368
ASV143	k__Bacteria;p__Actinobacteriota;c__Actinobacteria;o__Propionibacteriales;f__Propionibacteriaceae;g__Cutibacterium	0.00344658	0.00196947	0.000492368	0	0.0014771	0.00295421	0.000492368	0	0.000984737	0
ASV151	k__Bacteria;p__Proteobacteria;c__Gammaproteobacteria;o__Burkholderiales;f__Comamonadaceae;g__Comamonas	0.00443131	0.00541605	0.00590842	0	0.0113245	0.00246184	0.000492368	0.0014771	0	0
ASV156	k__Bacteria;p__Firmicutes;c__Bacilli;o__Bacillales;f__Bacillaceae;g__Bacillus	0	0.0152634	0.00196947	0	0.0201871	0.000984737	0	0	0.00246184	0.0014771
ASV199	k__Bacteria;p__Proteobacteria;c__Gammaproteobacteria;o__Burkholderiales;f__Alcaligenaceae;g__Castellaniella;s__Castellaniella_defragrans	0	0.000492368	0.000984737	0	0.00640079	0.000984737	0.000492368	0.000492368	0	0
ASV209	k__Bacteria;p__Proteobacteria;c__Gammaproteobacteria;o__Pseudomonadales;f__Pseudomonadaceae;g__Pseudomonas	0	0.00393895	0.00196947	0	0.00492368	0.00196947	0.00196947	0.000984737	0	0
ASV318	k__Bacteria;p__Firmicutes;c__Bacilli;o__Bacillales;f__Bacillaceae;g__Bacillus	0	0.00837026	0.000492368	0	0.00640079	0.000492368	0	0	0.000492368	0.000984737

## Sheet: ISX_Pupae_Adult_Common
ID	Taxonomy	ISX.Pupae1	ISX.Pupae2	ISX.Pupae3	ISX.Pupae4	ISX.Pupae5	ISX.Adult1	ISX.Adult2	ISX.Adult3	ISX.Adult4	ISX.Adult5
ASV26	k__Bacteria;p__Proteobacteria;c__Gammaproteobacteria;o__Enterobacterales;f__Yersiniaceae;g__Serratia	0	0.000984737	0.000492368	0.000984737	0	0	0.000984737	0.000984737	0.000984737	0.0492368
ASV33	k__Bacteria;p__Proteobacteria;c__Gammaproteobacteria;o__Xanthomonadales;f__Rhodanobacteraceae;g__Dyella	0	0.000984737	0.000492368	0.000492368	0	0	0.000984737	0.000492368	0.000492368	0.000492368

## Sheet: ISX_Larvae_Unique ASVs
ID	Taxonomy	ISX.Larvae1	ISX.Larvae2	ISX.Larvae3	ISX.Larvae4	ISX.Larvae5
ASV250	k__Bacteria;p__Proteobacteria;c__Alphaproteobacteria;o__Acetobacterales;f__Acetobacteraceae	0.0275726	0.009355	0.000984737	0.000492368	0.0103397
ASV349	k__Bacteria;p__Proteobacteria;c__Alphaproteobacteria;o__Acetobacterales;f__Acetobacteraceae	0.0152634	0.00541605	0	0	0.00886263
ASV227	k__Bacteria;p__Proteobacteria;c__Alphaproteobacteria;o__Acetobacterales;f__Acetobacteraceae;g__Endobacter;s__	0.0113245	0.00590842	0	0	0.00590842
ASV464	k__Bacteria;p__Proteobacteria;c__Alphaproteobacteria;o__Acetobacterales;f__Acetobacteraceae;g__Endobacter;s__	0.0123092	0.00196947	0	0	0.00837026
ASV651	k__Bacteria;p__Proteobacteria;c__Alphaproteobacteria;o__Acetobacterales;f__Acetobacteraceae;g__Endobacter	0.0103397	0.00393895	0	0	0.00541605
ASV567	k__Bacteria;p__Proteobacteria;c__Alphaproteobacteria;o__Acetobacterales;f__Acetobacteraceae	0.00640079	0.00344658	0.000492368	0	0.00590842
ASV533	k__Bacteria;p__Acidobacteriota;c__Acidobacteriae;o__Acidobacteriales;f__Acidobacteriaceae_(Subgroup_1);g__Bryocella;s__	0.0128016	0.000492368	0.000492368	0	0
ASV852	k__Bacteria;p__Proteobacteria;c__Alphaproteobacteria;o__Acetobacterales;f__Acetobacteraceae	0.00787789	0.00295421	0	0	0.00196947
ASV593	k__Bacteria;p__Proteobacteria;c__Alphaproteobacteria;o__Acetobacterales;f__Acetobacteraceae;g__Endobacter;s__	0.00246184	0.00738552	0	0	0.0014771
ASV229	k__Bacteria;p__Proteobacteria;c__Alphaproteobacteria;o__Sphingomonadales;f__Sphingomonadaceae;g__Novosphingobium	0.00984737	0.000492368	0	0	0.000984737
ASV518	k__Bacteria;p__Chloroflexi;c__Anaerolineae;o__SBR1031;f__A4b;g__;s__	0.000492368	0.00443131	0	0	0.00443131
ASV1103	k__Bacteria;p__Acidobacteriota;c__Acidobacteriae;o__Acidobacteriales;f__Acidobacteriaceae_(Subgroup_1);g__Bryocella;s__	0.00443131	0.000984737	0	0	0.000984737
ASV2116	k__Bacteria;p__Proteobacteria;c__Alphaproteobacteria;o__Rhizobiales;f__Beijerinckiaceae;g__Roseiarcus;s__	0.000492368	0.0014771	0	0	0.000492368
ASV1451	k__Bacteria;p__Bacteroidota;c__Bacteroidia;o__Cytophagales;f__Microscillaceae;g__Chryseolinea;s__	0	0.000492368	0.000492368	0	0.000984737
ASV2503	k__Bacteria;p__Proteobacteria;c__Alphaproteobacteria;o__Kiloniellales;f__Kiloniellaceae;g__Pelagibius	0.000492368	0.000492368	0	0	0.000984737
ASV2597	k__Bacteria;p__Bacteroidota;c__Bacteroidia;o__Cytophagales;f__Microscillaceae;g__Ohtaekwangia	0	0.000984737	0.000492368	0	0.000492368

## Sheet: ISX_Pupae_Unique ASVs
ID	Taxonomy	ISX.Pupae1	ISX.Pupae2	ISX.Pupae3	ISX.Pupae4	ISX.Pupae5
ASV25	k__Bacteria;p__Proteobacteria;c__Gammaproteobacteria;o__Xanthomonadales;f__Xanthomonadaceae;g__Pseudoxanthomonas	0	0.0014771	0.0388971	0.000984737	0
ASV253	k__Bacteria;p__Proteobacteria;c__Gammaproteobacteria;o__Xanthomonadales;f__Xanthomonadaceae;g__Stenotrophomonas	0	0.0014771	0.000984737	0.000492368	0.000492368
ASV324	k__Bacteria;p__Proteobacteria;c__Gammaproteobacteria;o__Enterobacterales	0	0.000984737	0	0.000984737	0.0014771
ASV803	k__Bacteria;p__Proteobacteria;c__Gammaproteobacteria;o__Pseudomonadales;f__Pseudomonadaceae;g__Pseudomonas	0	0.000492368	0	0.000492368	0.000492368
ASV907	k__Bacteria	0	0.000984737	0.000984737	0.000492368	0.000492368

## Sheet: ISX_Adult_Unique
ID	Taxonomy	ISX.Adult1	ISX.Adult2	ISX.Adult3	ISX.Adult4	ISX.Adult5
ASV44	k__Bacteria;p__Actinobacteriota;c__Actinobacteria;o__Micrococcales;f__Microbacteriaceae;g__Curtobacterium	0	0	0.000984737	0.000492368	0.000492368
ASV52	k__Bacteria;p__Proteobacteria;c__Gammaproteobacteria;o__Pseudomonadales;f__Pseudomonadaceae;g__Pseudomonas	0	0.146726	0.0128016	0.0014771	0.00443131
ASV271	k__Bacteria;p__Proteobacteria;c__Gammaproteobacteria;o__Enterobacterales;f__Erwiniaceae;g__Pantoea	0.000984737	0.000492368	0.00295421	0.000492368	0.000492368
